# Supplementary material
Source: PubMed Central journal article supplement (PMC1088375)

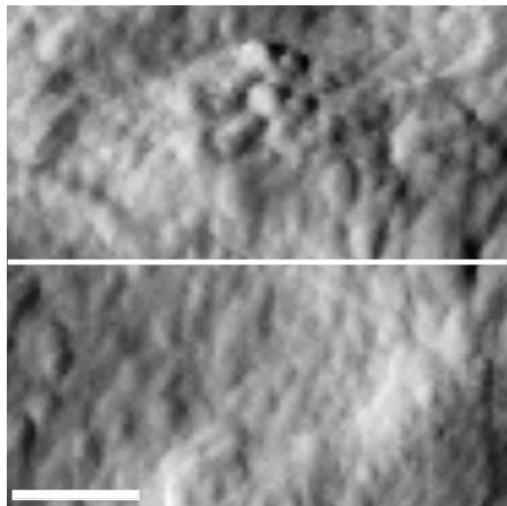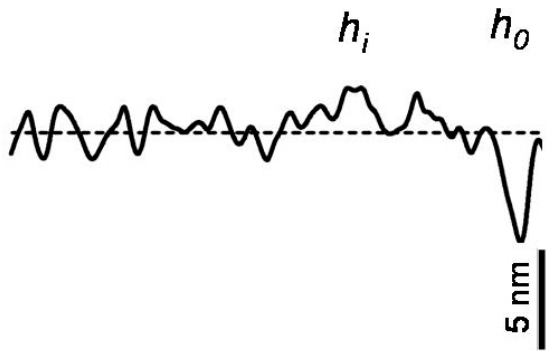

Supplement: pnas_102_18_6484__2.pdf [file pnas_102_18_6484__2.pdf]

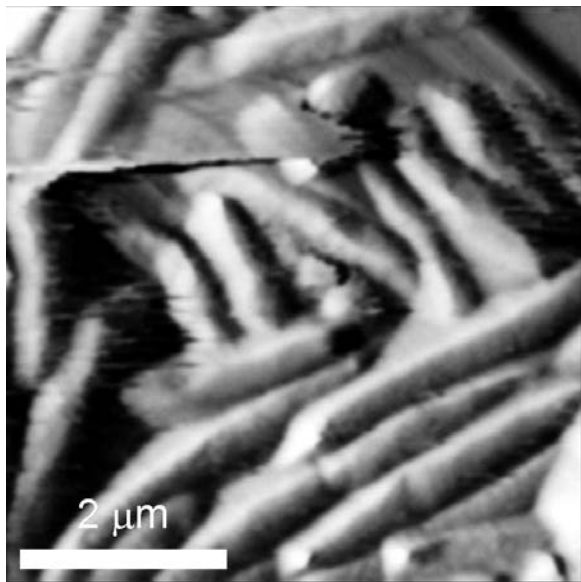

Supplement: pnas_102_18_6484__3.pdf [file pnas_102_18_6484__3.pdf]

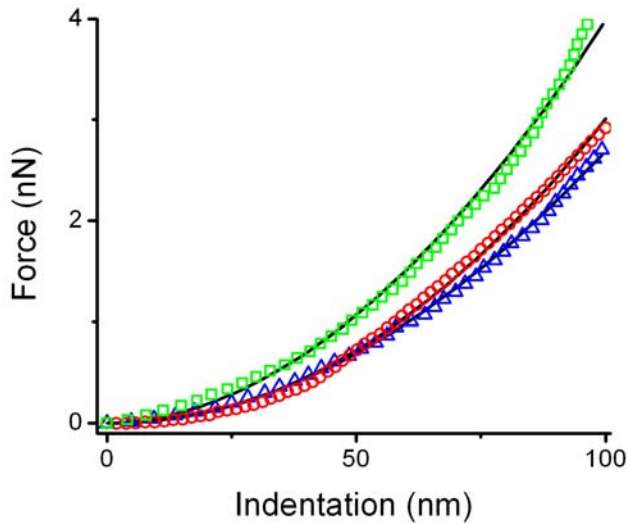

Supplement: pnas_102_18_6484__4.pdf [file pnas_102_18_6484__4.pdf]
